# Supplementary material for: BacteSign: Building a Findable, Accessible, Interoperable, and Reusable (FAIR) Database for Universal Bacterial Identification
Source: MDPI journal article supplement (doi:10.3390/bios14040176), 2024-04-05
Supplement: s1 [file s1]

## Supplementary

**Table S1.** Kirby Bauer and Optimized Stencil MIC Comparison

| Antibiotic      | Antibiotic Mass (μg) | A.B. Original Kirby (mm) ± std | A.B Kirby Comparison (mm) ± std | A. B. Stencil (mm) ± std | B. S. Original Kirby (mm) ± std | B. S. Kirby Comparison (mm) ± std | B.S Stencil (mm) ± std | P.A. Original Kirby (mm) ± std | P.A. Kirby Comparison (mm) ± std | P.A Stencil (mm) ± std |
|-----------------|----------------------|--------------------------------|---------------------------------|--------------------------|---------------------------------|-----------------------------------|------------------------|--------------------------------|----------------------------------|------------------------|
| Oxytetracycline | 7.5                  | 22.38 ± 0.06                   | 7.89 ± 0.06                     | 7.53 ± 0.16              | 25.73 ± 0.42                    | 9.56 ± 0.42                       | 8.52 ± 0.29            | 15.19 ± 0.03                   | 4.29 ± 0.03                      | 0.42 ± 0.31            |
|                 | 15                   | 25.57 ± 0.40                   | 9.485 ± 0.40                    | 10.05 ± 0.09             | 32.34 ± 0.25                    | 12.87 ± 0.25                      | 9.58 ± 0.13            | 16.59 ± 0.03                   | 4.99 ± 0.03                      | 1.34 ± 0               |
|                 | 30                   | 28.04 ± 0.21                   | 10.72 ± 0.21                    | 11.27 ± 0.3              | 36.01 ± 0.63                    | 14.71 ± 0.63                      | 10.69 ± 0.21           | 19.39 ± 0.22                   | 6.39 ± 0.22                      | 4.23 ± 0.66            |
|                 | 60                   | 30.39 ± 0.52                   | 11.89 ± 0.52                    | 12.87 ± 0.08             | 37.89 ± 0.29                    | 15.64 ± 0.29                      | 11.55 ± 0.12           | 20.58 ± 0.06                   | 6.99 ± 0.06                      | 6.46 ± 0.29            |
| Kanamycin       | 7.5                  | 15.44 ± 0.36                   | 4.42 ± 0.36                     | 4.25 ± 0.14              | 14.2 ± 0.18                     | 3.8 ± 0.18                        | 4.15 ± 0.21            | 0                              | 0                                | 0                      |
|                 | 15                   | 20.11 ± 0.02                   | 6.75 ± 0.02                     | 6.42 ± 0.09              | 17.75 ± 0.26                    | 5.57 ± 0.26                       | 5.39 ± 0.16            | 8.69 ± 0.47                    | 1.048 ± 0.47                     | 0.42                   |
|                 | 30                   | 22.21 ± 0.04                   | 7.81 ± 0.04                     | 7.89 ± 0.09              | 20.95 ± 0.23                    | 7.17 ± 0.23                       | 6.61 ± 0.03            | 11.66 ± 0.43                   | 2.53 ± 0.43                      | 1.78                   |
|                 | 60                   | 25.02 ± 0.07                   | 9.21 ± 0.07                     | 9.21 ± 0.21              | 23.90 ± 0.22                    | 8.65 ± 0.22                       | 7.66 ± 0.13            | 13.72 ± 0.29                   | 3.56 ± 0.29                      | 3.27                   |
| Streptomycin    | 2.5                  | 0                              | 0                               | 0                        | 0                               | 0                                 | 0                      | 8.79 ± 0.38                    | 1.09 ± 0.38                      | 0                      |
|                 | 5                    | 0                              | 0                               | 0                        | 0                               | 0                                 | 0                      | 13.51 ± 0.08                   | 3.45 ± 0.08                      | 1.93 ± 0.11            |
|                 | 10                   | 0                              | 0                               | 0                        | 0                               | 0                                 | 0                      | 17.82 ± 0.68                   | 5.61 ± 0.68                      | 3.75 ± 0.20            |
|                 | 20                   | 1.95 ± 0.48                    | 1.95* ± 0.48                    | 0.64 ± 0.46              | 7.61 ± 0.10                     | 0.51 ± 0.10                       | 0.85 ± 0.26            | 21.97 ± 0.48                   | 7.68 ± 0.48                      | 5.27 ± 0.09            |
| Penicillin G.   | 3                    | 0                              | 0                               | 0                        |                                 | 0                                 | 0                      | 0                              | 0                                | 0                      |
|                 | 6                    | 0                              | 0                               | 0                        |                                 | 0                                 | 0                      | 0                              | 0                                | 0                      |
|                 | 12                   | 0                              | 0                               | 0                        |                                 | 0                                 | 0                      | 0                              | 0                                | 0                      |
|                 | 24                   | 0                              | 0                               | 0                        | 5.13* ± 3.61                    | 5.13* ± 3.61                      | 0.36 ± 0.30            | 0                              | 0                                | 0                      |

\* Not subtracted as stated in [33] as this gives a negative value. A.B. = A. Baumannii, B.S. = B. Subtilis, and P.A. = P. Aeruginosa (calculated with  $n = 3$  samples).

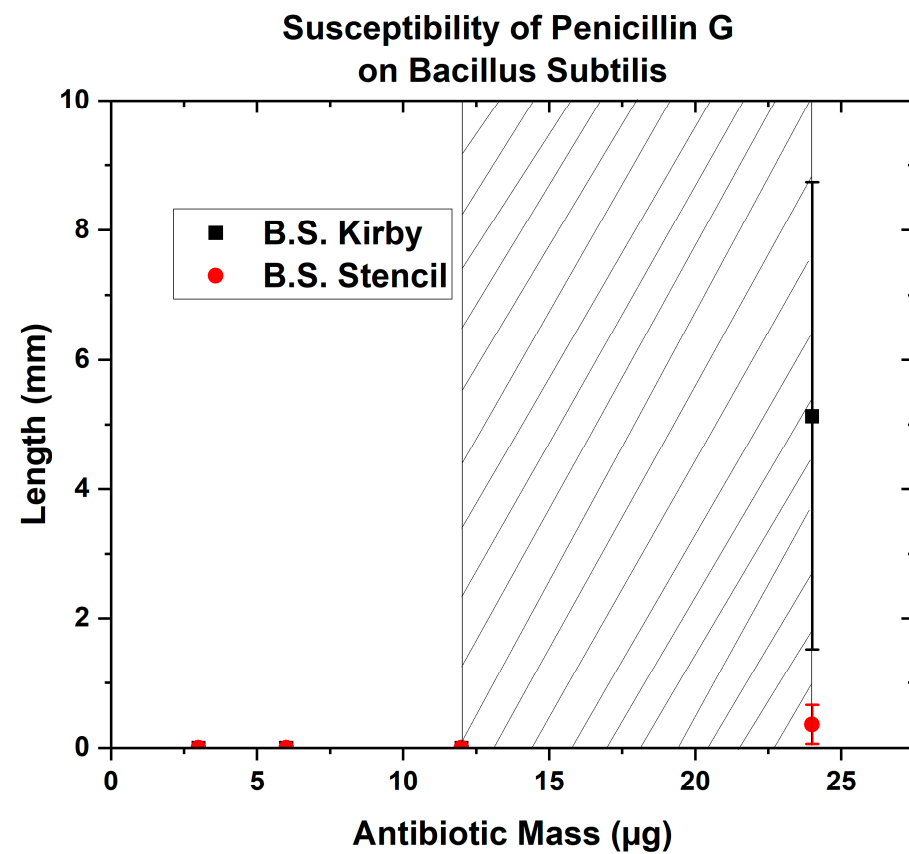

Figure S1. Antibiotic Susceptibility Test of Penicillin G on Bacillus Subtilis.

Penicillin G was found to be unsusceptible to *P. Aeruginosa* and *A. Baumannii* as shown in Table S1.

**Table S2.** Real Impedance at frequencies 482 Hz, 9.77 kHz and 159.7 kHz for the Control, *A. Baumannii*, *P. Aeruginosa* and *B. Subtilis*

| Bacteria                                          | Time (Hr) | Real Impedance (482.32 Hz) | STD ( $\pm$ ) | Real Impedance (9772.37 Hz) | STD ( $\pm$ ) | Real Impedance (159710.45 Hz) | STD ( $\pm$ ) |
|---------------------------------------------------|-----------|----------------------------|---------------|-----------------------------|---------------|-------------------------------|---------------|
| Control                                           | 0         | 276.492                    | 7.226         | 197.547                     | 7.267         | 179.751                       | 9.365         |
|                                                   | 1         | 244.091                    | 10360         | 175.608                     | 8.640         | 158.99                        | 11.266        |
|                                                   | 2         | 235.989                    | 11.146        | 172.495                     | 8.252         | 156.020                       | 10.617        |
|                                                   | 4         | 232.367                    | 14.344        | 173.269                     | 10.561        | 157.178                       | 13.005        |
|                                                   | 6         | 232.473                    | 8.656         | 176.526                     | 6.492         | 160.421                       | 5.610         |
|                                                   | 8         | 229.111                    | 7.687         | 176.526                     | 5.132         | 161.840                       | 6.384         |
|                                                   | 12        | 230.965                    | 9.793         | 180.258                     | 8.144         | 165.895                       | 9.810         |
|                                                   | 18        | 229.276                    | 10.975        | 179.508                     | 9.749         | 164.606                       | 11.053        |
|                                                   | 24        | 232.065                    | 11.698        | 182.658                     | 10.202        | 167.294                       | 10.345        |
|                                                   | 36        | 239.591                    | 11.446        | 188.747                     | 9.058         | 172.869                       | 9.399         |
|                                                   | 48        | 259.530                    | 34.563        | 205.435                     | 30.585        | 187.218                       | 30.805        |
| Acinetobacter Baumannii (OD <sub>600</sub> = 0.1) | 0         | 292.844                    | 41.682        | 209.861                     | 37.773        | 188.225                       | 33.975        |
|                                                   | 1         | 275.850                    | 25.96         | 200.662                     | 26.769        | 181.868                       | 24.223        |
|                                                   | 2         | 268.194                    | 20.565        | 197.756                     | 23.836        | 180.052                       | 22.346        |
|                                                   | 4         | 265.249                    | 17.052        | 197.706                     | 21.677        | 179.969                       | 20.597        |
|                                                   | 6         | 279.037                    | 28.116        | 207.273                     | 23.0315       | 189.638                       | 22.537        |
|                                                   | 8         | 256.904                    | 14.997        | 198.329                     | 18.928        | 181.361                       | 19.130        |
|                                                   | 12        | 266.330                    | 14.532        | 209.009                     | 18.170        | 189.960                       | 19.413        |
|                                                   | 18        | 265.574                    | 12.992        | 211.102                     | 16.277        | 192.769                       | 17.686        |
|                                                   | 24        | 277.985                    | 4.563         | 222.079                     | 7.106         | 202.152                       | 10.881        |
|                                                   | 36        | 307.529                    | 5.840         | 246.752                     | 2.15          | 222.828                       | 7.040         |
|                                                   | 48        | 1165.271                   | 967.286       | 1013.146                    | 858.396       | 959.730                       | 828.594       |
| Pseudomonas Aeruginosa (OD <sub>600</sub> = 0.4)  | 0         | 299.506                    | 12.751        | 225.497                     | 1.010         | 206.158                       | 6.989         |
|                                                   | 1         | 268.832                    | 22.943        | 207.278                     | 17.747        | 190.750                       | 19.901        |
|                                                   | 2         | 240.781                    | 29.010        | 186.727                     | 17.564        | 171.571                       | 14.787        |
|                                                   | 4         | 223.316                    | 26.404        | 175.363                     | 18.008        | 162.272                       | 15.569        |

|                                                   |    |           |           |           |          |           |          |
|---------------------------------------------------|----|-----------|-----------|-----------|----------|-----------|----------|
|                                                   | 6  | 213.857   | 26.0477   | 169.869   | 19.250   | 158.139   | 17.049   |
|                                                   | 8  | 204.077   | 16.342    | 164.039   | 13.504   | 153.825   | 13.250   |
|                                                   | 12 | 214.685   | 10.866    | 175.770   | 10.009   | 165.131   | 10.947   |
|                                                   | 18 | 324.526   | 172.936   | 282.433   | 165.055  | 270.621   | 162.482  |
|                                                   | 24 | 956.0166  | 1056.186  | 811.797   | 904.729  | 763.694   | 851.870  |
|                                                   | 36 | 22348.171 | 6754.372  | 14397.180 | 2377.514 | 11628.994 | 653.949  |
|                                                   | 48 | 40138.749 | 15990.509 | 24911.153 | 6884.693 | 16795.947 | 1455.167 |
| Bacillus<br>Subtilis<br>(OD <sub>600</sub> = 1.0) | 0  | 347.365   | 57.098    | 260.747   | 45.198   | 235.88995 | 41.224   |
|                                                   | 1  | 264.621   | 48.641    | 203.323   | 37.726   | 185.699   | 34.472   |
|                                                   | 2  | 253.146   | 54.214    | 200.816   | 44.585   | 186.315   | 41.890   |
|                                                   | 4  | 235.188   | 42.450    | 192.216   | 34.126   | 179.959   | 31.467   |
|                                                   | 6  | 256.045   | 39.727    | 213.925   | 33.317   | 201.070   | 31.153   |
|                                                   | 8  | 214.871   | 37.504    | 181.610   | 32.598   | 171.503   | 30.773   |
|                                                   | 12 | 207.288   | 35.699    | 175.304   | 31.260   | 165.325   | 29.377   |
|                                                   | 18 | 204.899   | 33.989    | 173.220   | 29.492   | 162.755   | 27.366   |
|                                                   | 24 | 209.906   | 30.790    | 177.177   | 26.628   | 165.444   | 25.046   |
|                                                   | 36 | 206.257   | 25.692    | 173.922   | 22.402   | 161.745   | 20.895   |
|                                                   | 48 | 204.379   | 24.074    | 172.246   | 21.458   | 159.535   | 20.382   |

**Table S3.** Imaginary Impedance at frequencies 482.32 Hz, 9.77 kHz and 159.7 kHz for the Control, *A. Baumannii*, *P. Aeruginosa* and *B. Subtilis*

| Bacteria                                          | Time (Hr) | Imaginary Impedance (482.32 Hz) | STD ( $\pm$ ) | Imaginary Impedance (9772.37 Hz) | STD ( $\pm$ ) | Imaginary Impedance (159710.45 Hz) | STD ( $\pm$ ) |
|---------------------------------------------------|-----------|---------------------------------|---------------|----------------------------------|---------------|------------------------------------|---------------|
| Control                                           | 0         | -146.338                        | 14.774        | -41.812                          | 2.261         | -8.254                             | 2.391         |
|                                                   | 1         | -128.463                        | 11.853        | -37.268                          | 1.899         | -6.839                             | 1.585         |
|                                                   | 2         | -120.594                        | 8.085         | -35.119                          | 1.144         | -6.570                             | 1.300         |
|                                                   | 4         | -115.868                        | 5.871         | -33.173                          | 1.157         | -6.521                             | 1.309         |
|                                                   | 6         | -112.974                        | 5.968         | -31.793                          | 1.661         | -6.629                             | 1.553         |
|                                                   | 8         | -109.194                        | 6.209         | -29.726                          | 2.159         | -6.443                             | 1.474         |
|                                                   | 12        | -107.818                        | 6.298         | -28.590                          | 2.237         | 6.634                              | 1.689         |
|                                                   | 18        | -108.202                        | 5.955         | -28.438                          | 2.262         | -7.157                             | 1.935         |
|                                                   | 24        | -109.778                        | 6.768         | -28.603                          | 2.821         | -7.613                             | 2.409         |
|                                                   | 36        | -113.316                        | 8.260         | -29.346                          | 3.227         | -8.039                             | 2.542         |
|                                                   | 48        | -121.260                        | 13.39         | -31.793                          | 3.634         | -9.426                             | 2.494         |
| Acinetobacter Baumannii (OD <sub>600</sub> = 0.1) | 0         | -159.391                        | 2.055         | -46.157                          | 1.841         | -9.5135                            | 1.326         |
|                                                   | 1         | -147.657                        | 2.506         | -41.465                          | 0.558         | -8.113                             | 0.732         |
|                                                   | 2         | -137.349                        | 2.395         | -38.329                          | 0.788         | -7.871                             | 0.463         |
|                                                   | 4         | -128.552                        | 3.677         | -36.596                          | 1.109         | -8.161                             | 0.598         |
|                                                   | 6         | -128.014                        | 2.361         | -35.235                          | 1.821         | -8.358                             | 0.439         |
|                                                   | 8         | -110.976                        | 4.423         | -32.155                          | 1.356         | -8.119                             | 0.302         |
|                                                   | 12        | -112.162                        | 4.801         | -32.381                          | 1.756         | -9.423                             | 0.290         |
|                                                   | 18        | -111.460                        | 5.358         | -30.898                          | 1.936         | -9.241                             | 0.781         |
|                                                   | 24        | -118.548                        | 7.993         | -32.073                          | 3.824         | -10.298                            | 1.312         |
|                                                   | 36        | -131.118                        | 7.182         | -35.630                          | 5.338         | -12.512                            | 2.821         |
|                                                   | 48        | -270.773                        | 168.836       | -73.755                          | 42.497        | -31.550                            | 20.523        |
| Pseudomonas Aeruginosa (OD <sub>600</sub> = 0.4)  | 0         | -137.851                        | 16.818        | -40.978                          | 7.389         | -7.959                             | 2.629         |
|                                                   | 1         | -124.482                        | 17.597        | -35.520                          | 7.483         | -6.888                             | 2.506         |
|                                                   | 2         | -115.789                        | 16.958        | -31.510                          | 7.184         | -6.334                             | 2.447         |

|                                                   |    |            |           |           |          |           |          |
|---------------------------------------------------|----|------------|-----------|-----------|----------|-----------|----------|
|                                                   | 4  | -109.681   | 13.795    | -28.054   | 6.089    | -5.785    | 2.229    |
|                                                   | 6  | -104.720   | 13.639    | -25.587   | 5.912    | -5.571    | 2.280    |
|                                                   | 8  | -98.179    | 8.139     | -23.005   | 4.006    | -5.257    | 1.735    |
|                                                   | 12 | -97.319    | 8.142     | -22.644   | 3.903    | -5.713    | 1.816    |
|                                                   | 18 | -115.240   | 31.612    | -24.718   | 6.003    | -6.924    | 2.731    |
|                                                   | 24 | -236.469   | 200.619   | -68.169   | 65.991   | -28.927   | 32.652   |
|                                                   | 36 | -11409.902 | 5539.428  | -3512.750 | 1719.755 | -1735.417 | 976.137  |
|                                                   | 48 | -20443.405 | 10538.206 | -8324.228 | 4785.135 | -4459.828 | 2506.907 |
| Bacillus<br>Subtilis<br>(OD <sub>600</sub> = 1.0) | 0  | -154.467   | 22.531    | -47.868   | 7.267    | -10.076   | 1.788    |
|                                                   | 1  | -120.047   | 17.086    | -34.742   | 5.786    | -6.767    | 1.497    |
|                                                   | 2  | -111.207   | 16.287    | -29.966   | 5.615    | -6.078    | 1.437    |
|                                                   | 4  | -96.508    | 14.317    | -24.345   | 4.585    | -5.559    | 1.236    |
|                                                   | 6  | -93.232    | 12.188    | -23.391   | 3.547    | -6.137    | 1.193    |
|                                                   | 8  | -74.948    | 8.561     | -18.114   | 2.511    | -5.075    | 1.116    |
|                                                   | 12 | -70.612    | 7.537     | -17.607   | 2.563    | -5.040    | 1.066    |
|                                                   | 18 | -68.197    | 7.427     | -17.438   | 2.433    | -5.257    | 1.151    |
|                                                   | 24 | -68.928    | 6.938     | -18.145   | 2.180    | -6.030    | 0.816    |
|                                                   | 36 | -66.529    | 4.678     | -17.920   | 1.704    | -6.240    | 0.693    |
|                                                   | 48 | -62.717    | 3.159     | -17.528   | 1.090    | -6.533    | 0.643    |

**Table S4.** Phase at frequencies 482 Hz, 9.77 kHz and 159.7 kHz for the Control, *A. Baumannii*, *P. Aeruginosa* and *B. Subtilis*

| Bacteria                                          | Time (Hr) | Phase (482.32 Hz) | STD (±) | Phase (9772.37 Hz) | STD (±) | Phase (159710.45 Hz) | STD (±) |
|---------------------------------------------------|-----------|-------------------|---------|--------------------|---------|----------------------|---------|
| Control                                           | 0         | -27.818           | 1.479   | -11.950            | 0.478   | -2.663               | 0.885   |
|                                                   | 1         | -27.718           | 2.786   | -12.002            | 0.739   | -2.516               | 0.781   |
|                                                   | 2         | -27.054           | 2.757   | -11.523            | 0.465   | -2.452               | 0.654   |
|                                                   | 4         | -26.541           | 2.802   | -10.871            | 0.656   | -2.434               | 0.715   |
|                                                   | 6         | -25.903           | 2.865   | -10.218            | 0.161   | -2.365               | 0.543   |
|                                                   | 8         | -25.467           | 3.016   | -9.552             | 0.553   | -2.298               | 0.603   |
|                                                   | 12        | -25.019           | 3.209   | -9.019             | 0.707   | -2.323               | 0.709   |
|                                                   | 18        | -25.269           | 3.467   | -9.019             | 0.770   | -2.521               | 0.763   |
|                                                   | 24        | -25.308           | 3.793   | -8.901             | 0.759   | -2.627               | 0.892   |
|                                                   | 36        | -25.283           | 4.252   | -8.827             | 0.788   | -2.684               | 0.912   |
|                                                   | 48        | -25.107           | 4.909   | -8.871             | 0.853   | -2.953               | 0.921   |
| Acinetobacter Baumannii (OD <sub>600</sub> = 0.1) | 0         | -28.747           | 3.788   | -12.695            | 1.724   | -2.917               | 0.176   |
|                                                   | 1         | -27.979           | 2.949   | -11.858            | 1.455   | -2.569               | 0.136   |
|                                                   | 2         | -27.002           | 2.384   | -11.136            | 1.465   | -2.524               | 0.182   |
|                                                   | 4         | -26.113           | 1.751   | -10.626            | 1.358   | -2.615               | 0.219   |
|                                                   | 6         | -24.426           | 1.968   | -9.787             | 1.371   | -2.547               | 0.207   |
|                                                   | 8         | -24.053           | 1.306   | -9.321             | 1.227   | -2.581               | 0.170   |
|                                                   | 12        | -23.539           | 1.299   | -8.907             | 1.221   | -2.868               | 0.291   |
|                                                   | 18        | -13.251           | 1.477   | -8.412             | 1.150   | -2.769               | 0.353   |
|                                                   | 24        | -23.117           | 1.264   | -8.248             | 1.187   | -2.943               | 0.511   |
|                                                   | 36        | -22.635           | 1.175   | -8.218             | 1.256   | -3.237               | 0.802   |
|                                                   | 48        | -16.627           | 4.261   | -5.547             | 2.182   | -2.514               | 1.174   |
| Pseudomonas Aeruginosa (OD <sub>600</sub> = 0.4)  | 0         | -24.615           | 1.775   | -10.296            | 1.862   | -2.236               | 0.790   |
|                                                   | 1         | -24.802           | 2.395   | -9.794             | 2.119   | -2.106               | 0.778   |
|                                                   | 2         | -25.639           | 1.694   | -9.530             | 1.678   | -2.094               | 0.698   |

|                                                   |    |         |       |         |       |         |       |
|---------------------------------------------------|----|---------|-------|---------|-------|---------|-------|
|                                                   | 4  | -26.178 | 1.768 | -9.075  | 1.568 | -2.028  | 0.675 |
|                                                   | 6  | -26.112 | 1.641 | -8.562  | 1.571 | -2.009  | 0.722 |
|                                                   | 8  | -25.726 | 1.636 | -8.027  | 1.423 | -1.975  | 0.644 |
|                                                   | 12 | -24.369 | 1.514 | -7.370  | 1.422 | -2.009  | 0.722 |
|                                                   | 18 | -21.700 | 4.475 | -6.062  | 2.220 | -1.745  | 0.842 |
|                                                   | 24 | -20.215 | 5.847 | -6.250  | 1.712 | -2.152  | 0.789 |
|                                                   | 36 | -25.693 | 4.102 | -12.989 | 3.93  | -8.212  | 4.088 |
|                                                   | 48 | -25.901 | 2.905 | -17.066 | 4.697 | -14.131 | 6.353 |
| Bacillus<br>Subtilis<br>(OD <sub>600</sub> = 1.0) | 0  | -24.040 | 0.675 | -10.451 | 0.538 | -2.448  | 0.114 |
|                                                   | 1  | -24.548 | 0.834 | -9.728  | 0.190 | -2.076  | 0.096 |
|                                                   | 2  | -23.982 | 1.324 | -8.548  | 0.335 | -1.866  | 0.084 |
|                                                   | 4  | -22.420 | 0.719 | -7.207  | 0.124 | -1.757  | 0.098 |
|                                                   | 6  | -20.086 | 0.517 | -6.244  | 0.029 | -1.736  | 0.079 |
|                                                   | 8  | -19.395 | 0.995 | -5.734  | 0.215 | -1.684  | 0.062 |
|                                                   | 12 | -18.987 | 1.103 | -5.766  | 0.179 | -1.736  | 0.055 |
|                                                   | 18 | -18.553 | 0.901 | -5.776  | 0.172 | -1.835  | 0.088 |
|                                                   | 24 | -18.282 | 0.726 | -5.872  | 0.166 | -2.094  | 0.121 |
|                                                   | 36 | -17.979 | 0.855 | -5.908  | 0.222 | -2.214  | 0.049 |
|                                                   | 48 | -17.190 | 1.229 | -5.855  | 0.362 | -2.358  | 0.165 |



**Table S5.** Capacitance at frequencies 482 Hz, 9.77 kHz and 159.7 kHz for the Control, *A. Baumannii*, *P. Aeruginosa* and *B. Subtilis*

| Bacteria                                          | Time (Hr) | Capacitance (F) (@ 482.32 Hz) | STD (F)                | Capacitance (F) (@ 9772.37 Hz) | STD (F)                | Capacitance (F) (@ 159710.45 Hz) | STD                    |
|---------------------------------------------------|-----------|-------------------------------|------------------------|--------------------------------|------------------------|----------------------------------|------------------------|
| Control                                           | 0         | 2.278×10 <sup>-6</sup>        | 2.322×10 <sup>-7</sup> | 3.906×10 <sup>-7</sup>         | 2.162×10 <sup>-8</sup> | 1.298×10 <sup>-7</sup>           | 3.135×10 <sup>-8</sup> |
|                                                   | 1         | 2.589×10 <sup>-6</sup>        | 2.262×10 <sup>-7</sup> | 4.381×10 <sup>-7</sup>         | 2.231×10 <sup>-8</sup> | 1.529×10 <sup>-7</sup>           | 3.123×10 <sup>-8</sup> |
|                                                   | 2         | 2.748×10 <sup>-6</sup>        | 1.766×10 <sup>-7</sup> | 4.642×10 <sup>-7</sup>         | 1.507×10 <sup>-8</sup> | 1.570×10 <sup>-7</sup>           | 2.737×10 <sup>-8</sup> |
|                                                   | 4         | 2.855×10 <sup>-6</sup>        | 1.407×10 <sup>-7</sup> | 4.915×10 <sup>-7</sup>         | 1.696×10 <sup>-8</sup> | 1.584×10 <sup>-7</sup>           | 2.794×10 <sup>-8</sup> |
|                                                   | 6         | 2.929×10 <sup>-6</sup>        | 1.596×10 <sup>-7</sup> | 5.137×10 <sup>-7</sup>         | 2.785×10 <sup>-8</sup> | 1.577×10 <sup>-7</sup>           | 3.181×10 <sup>-8</sup> |
|                                                   | 8         | 3.032×10 <sup>-6</sup>        | 1.775×10 <sup>-7</sup> | 5.509×10 <sup>-7</sup>         | 4.183×10 <sup>-8</sup> | 1.620×10 <sup>-7</sup>           | 3.245×10 <sup>-8</sup> |
|                                                   | 12        | 3.071×10 <sup>-6</sup>        | 1.871×10 <sup>-7</sup> | 5.733×10 <sup>-7</sup>         | 4.730×10 <sup>-8</sup> | 1.589×10 <sup>-7</sup>           | 3.445×10 <sup>-8</sup> |
|                                                   | 18        | 3.058×10 <sup>-6</sup>        | 1.683×10 <sup>-7</sup> | 5.761×10 <sup>-7</sup>         | 4.395×10 <sup>-8</sup> | 1.485×10 <sup>-7</sup>           | 3.465×10 <sup>-8</sup> |
|                                                   | 24        | 3.017×10 <sup>-6</sup>        | 1.914×10 <sup>-7</sup> | 5.748×10 <sup>-7</sup>         | 5.600×10 <sup>-8</sup> | 1.427×10 <sup>-7</sup>           | 3.756×10 <sup>-8</sup> |
|                                                   | 36        | 2.928×10 <sup>-6</sup>        | 2.244×10 <sup>-7</sup> | 5.618×10 <sup>-7</sup>         | 6.252×10 <sup>-8</sup> | 1.351×10 <sup>-7</sup>           | 3.541×10 <sup>-8</sup> |
|                                                   | 48        | 2.755×10 <sup>-6</sup>        | 3.094×10 <sup>-7</sup> | 5.196×10 <sup>-7</sup>         | 6.443×10 <sup>-8</sup> | 1.128×10 <sup>-7</sup>           | 2.721×10 <sup>-8</sup> |
| Acinetobacter Baumannii (OD <sub>600</sub> = 0.1) | 0         | 2.089×10 <sup>-6</sup>        | 4.601×10 <sup>-8</sup> | 3.533×10 <sup>-7</sup>         | 1.376×10 <sup>-8</sup> | 1.066×10 <sup>-7</sup>           | 1.359×10 <sup>-8</sup> |
|                                                   | 1         | 2.273×10 <sup>-6</sup>        | 7.898×10 <sup>-8</sup> | 3.928×10 <sup>-7</sup>         | 5.341×10 <sup>-9</sup> | 1.237×10 <sup>-7</sup>           | 1.050×10 <sup>-8</sup> |
|                                                   | 2         | 2.43×10 <sup>-6</sup>         | 6.890×10 <sup>-8</sup> | 4.250×10 <sup>-7</sup>         | 8.655×10 <sup>-9</sup> | 1.270×10 <sup>-7</sup>           | 7.183×10 <sup>-8</sup> |
|                                                   | 4         | 2.548×10 <sup>-6</sup>        | 6.277×10 <sup>-8</sup> | 4.454×10 <sup>-7</sup>         | 1.322×10 <sup>-8</sup> | 1.227×10 <sup>-7</sup>           | 8.883×10 <sup>-8</sup> |
|                                                   | 6         | 2.624×10 <sup>-6</sup>        | 5.874×10 <sup>-7</sup> | 4.634×10 <sup>-7</sup>         | 2.459×10 <sup>-8</sup> | 1.195×10 <sup>-7</sup>           | 6.385×10 <sup>-8</sup> |
|                                                   | 8         | 2.888×10 <sup>-6</sup>        | 1.213×10 <sup>-7</sup> | 5.073×10 <sup>-7</sup>         | 2.133×10 <sup>-8</sup> | 1.229×10 <sup>-7</sup>           | 4.566×10 <sup>-9</sup> |
|                                                   | 12        | 2.854×10 <sup>-6</sup>        | 1.269×10 <sup>-7</sup> | 5.044×10 <sup>-7</sup>         | 2.707×10 <sup>-8</sup> | 1.058×10 <sup>-7</sup>           | 3.192×10 <sup>-9</sup> |
|                                                   | 18        | 2.902×10 <sup>-6</sup>        | 1.215×10 <sup>-7</sup> | 5.291×10 <sup>-7</sup>         | 3.333×10 <sup>-8</sup> | 1.085×10 <sup>-7</sup>           | 8.659×10 <sup>-9</sup> |
|                                                   | 24        | 2.790×10 <sup>-6</sup>        | 1.762×10 <sup>-7</sup> | 5.148×10 <sup>-7</sup>         | 5.952×10 <sup>-8</sup> | 9.851×10 <sup>-8</sup>           | 1.371×10 <sup>-8</sup> |
|                                                   | 36        | 2.583×10 <sup>-6</sup>        | 1.901×10 <sup>-7</sup> | 4.678×10 <sup>-7</sup>         | 7.228×10 <sup>-8</sup> | 8.476×10 <sup>-8</sup>           | 2.272×10 <sup>-8</sup> |
|                                                   | 48        | 1.565×10 <sup>-6</sup>        | 6.613×10 <sup>-7</sup> | 2.893×10 <sup>-7</sup>         | 1.192×10 <sup>-7</sup> | 4.500×10 <sup>-8</sup>           | 2.108×10 <sup>-8</sup> |
|                                                   | 0         | 2.431×10 <sup>-6</sup>        | 3.128×10 <sup>-7</sup> | 4.124×10 <sup>-7</sup>         | 8.369×10 <sup>-8</sup> | 1.438×10 <sup>-7</sup>           | 5.731×10 <sup>-8</sup> |

|                                                        |    |                        |                        |                        |                        |                         |                         |
|--------------------------------------------------------|----|------------------------|------------------------|------------------------|------------------------|-------------------------|-------------------------|
| Pseudomonas<br>Aeruginosa<br>(OD <sub>600</sub> = 0.4) | 1  | 2.702×10 <sup>-6</sup> | 3.696×10 <sup>-7</sup> | 4.796×10 <sup>-7</sup> | 1.014×10 <sup>-7</sup> | 1.651×10 <sup>-7</sup>  | 5.822×10 <sup>-8</sup>  |
|                                                        | 2  | 2.911×10 <sup>-6</sup> | 4.202×10 <sup>-7</sup> | 5.447×10 <sup>-7</sup> | 1.240×10 <sup>-7</sup> | 1.829×10 <sup>-7</sup>  | 6.878×10 <sup>-8</sup>  |
|                                                        | 4  | 3.054×10 <sup>-6</sup> | 3.700×10 <sup>-7</sup> | 6.075×10 <sup>-7</sup> | 1.258×10 <sup>-7</sup> | 1.980×10 <sup>-7</sup>  | 6.904×10 <sup>-8</sup>  |
|                                                        | 6  | 3.200×10 <sup>-6</sup> | 3.834×10 <sup>-7</sup> | 6.683×10 <sup>-7</sup> | 1.385×10 <sup>-7</sup> | 2.076×10 <sup>-7</sup>  | 7.184×10 <sup>-8</sup>  |
|                                                        | 8  | 3.383×10 <sup>-6</sup> | 2.724×10 <sup>-7</sup> | 7.297×10 <sup>-7</sup> | 1.260×10 <sup>-7</sup> | 2.112×10 <sup>-7</sup>  | 6.766×10 <sup>-8</sup>  |
|                                                        | 12 | 3.415×10 <sup>-6</sup> | 2.977×10 <sup>-7</sup> | 7.430×10 <sup>-7</sup> | 1.390×10 <sup>-7</sup> | 1.980×10 <sup>-7</sup>  | 7.539×10 <sup>-8</sup>  |
|                                                        | 18 | 3.061×10 <sup>-6</sup> | 7.242×10 <sup>-7</sup> | 7.016×10 <sup>-7</sup> | 1.786×10 <sup>-7</sup> | 1.765×10 <sup>-7</sup>  | 8.503×10 <sup>-8</sup>  |
|                                                        | 24 | 2.540×10 <sup>-6</sup> | 1.353×10 <sup>-6</sup> | 5.521×10 <sup>-7</sup> | 3.365×10 <sup>-7</sup> | 1.402×10 <sup>-7</sup>  | 1.127×10 <sup>-7</sup>  |
|                                                        | 36 | 3.572×10 <sup>-8</sup> | 1.450×10 <sup>-8</sup> | 5.670×10 <sup>-7</sup> | 2.136×10 <sup>-9</sup> | 7.547×10 <sup>-10</sup> | 3.310×10 <sup>-10</sup> |
|                                                        | 48 | 2.039×10 <sup>-8</sup> | 8.533×10 <sup>-9</sup> | 2.588×10 <sup>-9</sup> | 1.126×10 <sup>-9</sup> | 2.942×10 <sup>-10</sup> | 1.304×10 <sup>-10</sup> |
| Bacillus<br>Subtilis<br>(OD <sub>600</sub> = 1.0)      | 0  | 2.178×10 <sup>-6</sup> | 2.884×10 <sup>-7</sup> | 3.474×10 <sup>-7</sup> | 4.763×10 <sup>-8</sup> | 1.017×10 <sup>-7</sup>  | 1.606×10 <sup>-8</sup>  |
|                                                        | 1  | 2.800×10 <sup>-6</sup> | 3.648×10 <sup>-7</sup> | 4.807×10 <sup>-7</sup> | 7.199×10 <sup>-8</sup> | 1.537×10 <sup>-7</sup>  | 2.942×10 <sup>-8</sup>  |
|                                                        | 2  | 3.026×10 <sup>-6</sup> | 4.027×10 <sup>-7</sup> | 5.608×10 <sup>-7</sup> | 9.282×10 <sup>-8</sup> | 1.722×10 <sup>-7</sup>  | 3.495×10 <sup>-8</sup>  |
|                                                        | 4  | 3.488×10 <sup>-6</sup> | 4.702×10 <sup>-7</sup> | 6.907×10 <sup>-7</sup> | 1.159×10 <sup>-7</sup> | 1.872×10 <sup>-7</sup>  | 3.601×10 <sup>-8</sup>  |
|                                                        | 6  | 3.607×10 <sup>-6</sup> | 5.196×10 <sup>-7</sup> | 7.146×10 <sup>-7</sup> | 1.213×10 <sup>-7</sup> | 1.698×10 <sup>-7</sup>  | 3.827×10 <sup>-8</sup>  |
|                                                        | 8  | 4.456×10 <sup>-6</sup> | 4.714×10 <sup>-7</sup> | 9.151×10 <sup>-7</sup> | 1.164×10 <sup>-7</sup> | 2.049×10 <sup>-7</sup>  | 3.911×10 <sup>-8</sup>  |
|                                                        | 12 | 4.723×10 <sup>-6</sup> | 4.692×10 <sup>-7</sup> | 9.430×10 <sup>-7</sup> | 1.245×10 <sup>-7</sup> | 2.057×10 <sup>-7</sup>  | 3.790×10 <sup>-8</sup>  |
|                                                        | 18 | 4.892×10 <sup>-6</sup> | 4.949×10 <sup>-7</sup> | 9.508×10 <sup>-7</sup> | 1.214×10 <sup>-7</sup> | 1.977×10 <sup>-7</sup>  | 3.766×10 <sup>-8</sup>  |
|                                                        | 24 | 4.833×10 <sup>-6</sup> | 4.556×10 <sup>-7</sup> | 9.096×10 <sup>-7</sup> | 1.008×10 <sup>-7</sup> | 1.682×10 <sup>-7</sup>  | 2.254×10 <sup>-8</sup>  |
|                                                        | 36 | 4.983×10 <sup>-6</sup> | 3.368×10 <sup>-7</sup> | 9.165×10 <sup>-7</sup> | 8.170×10 <sup>-8</sup> | 1.616×10 <sup>-7</sup>  | 1.721×10 <sup>-8</sup>  |
|                                                        | 48 | 5.275×10 <sup>-6</sup> | 2.755×10 <sup>-7</sup> | 9.327×10 <sup>-7</sup> | 5.878×10 <sup>-8</sup> | 1.541×10 <sup>-7</sup>  | 1.631×10 <sup>-7</sup>  |

Below are timepoints and images from the confocal and SEM microscope with the appropriate real, imaginary, phase angle and capacitive values.

*Control 18-hours*

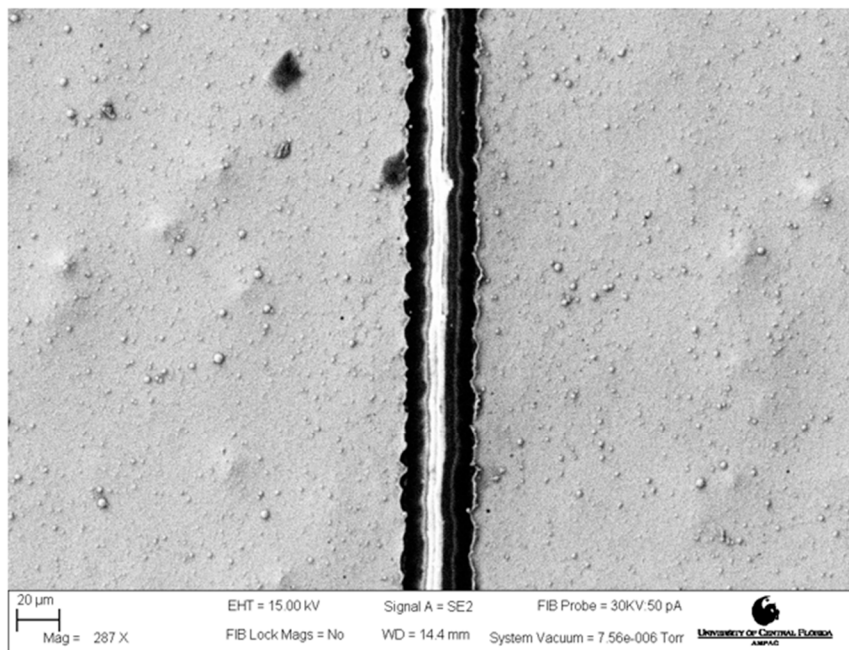

*Control 48-hours*

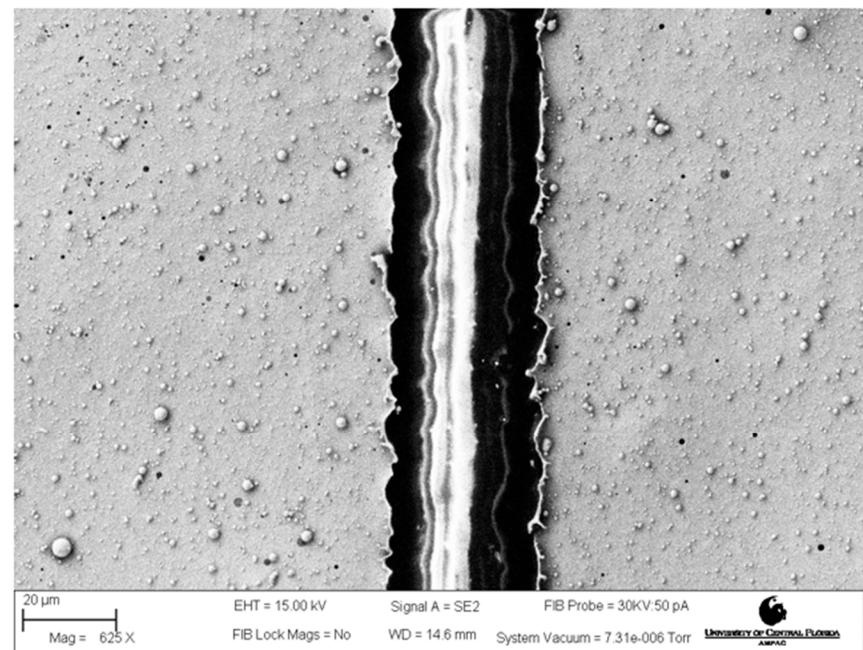

Figure S2. (A) SEM image of the control IDE after 18 hours. (B) Confocal Height map of the control IDE after 48-hours, showing no change on the surface of the IDE or in the spacing.

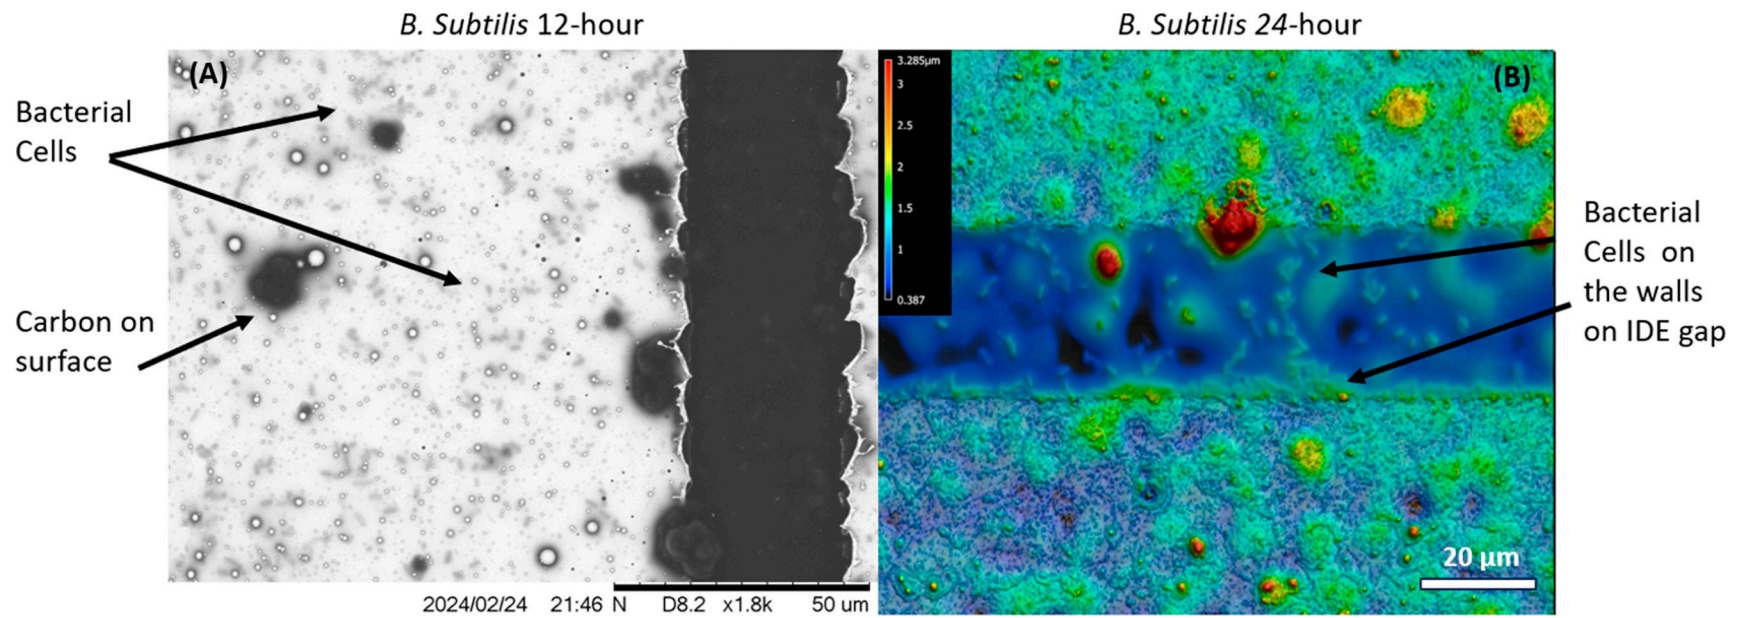

Figure S3. (A) SEM image of *B. Subtilis* 12-hour bacterial growth. (B) Confocal Height map of *B. Subtilis* 24-hour, showing cell growth in IDE gap.

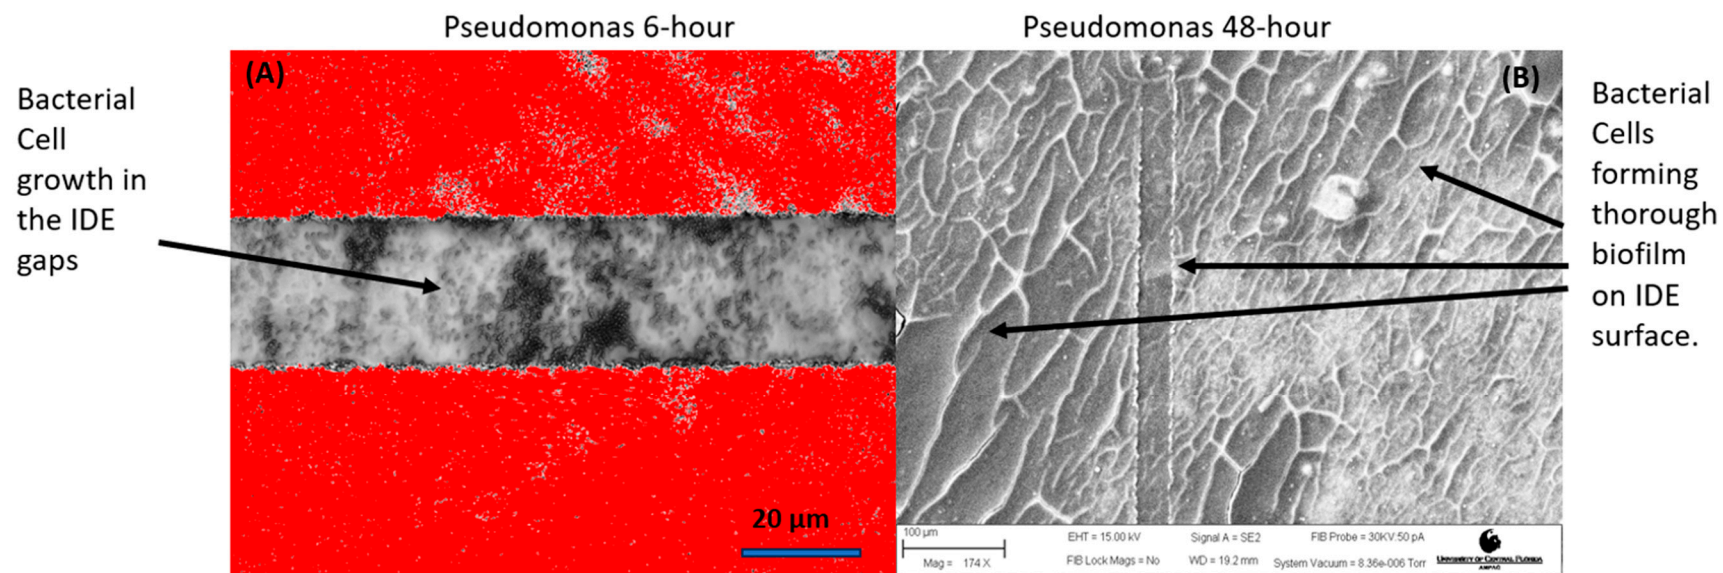

Figure S4. (A) Laser Confocal Image showing biofilm growth in the IDE gap. (B) SEM picture showing IDE surface covered with biofilm.

Pseudomonas 48-hour

Pseudomonas 48-hour

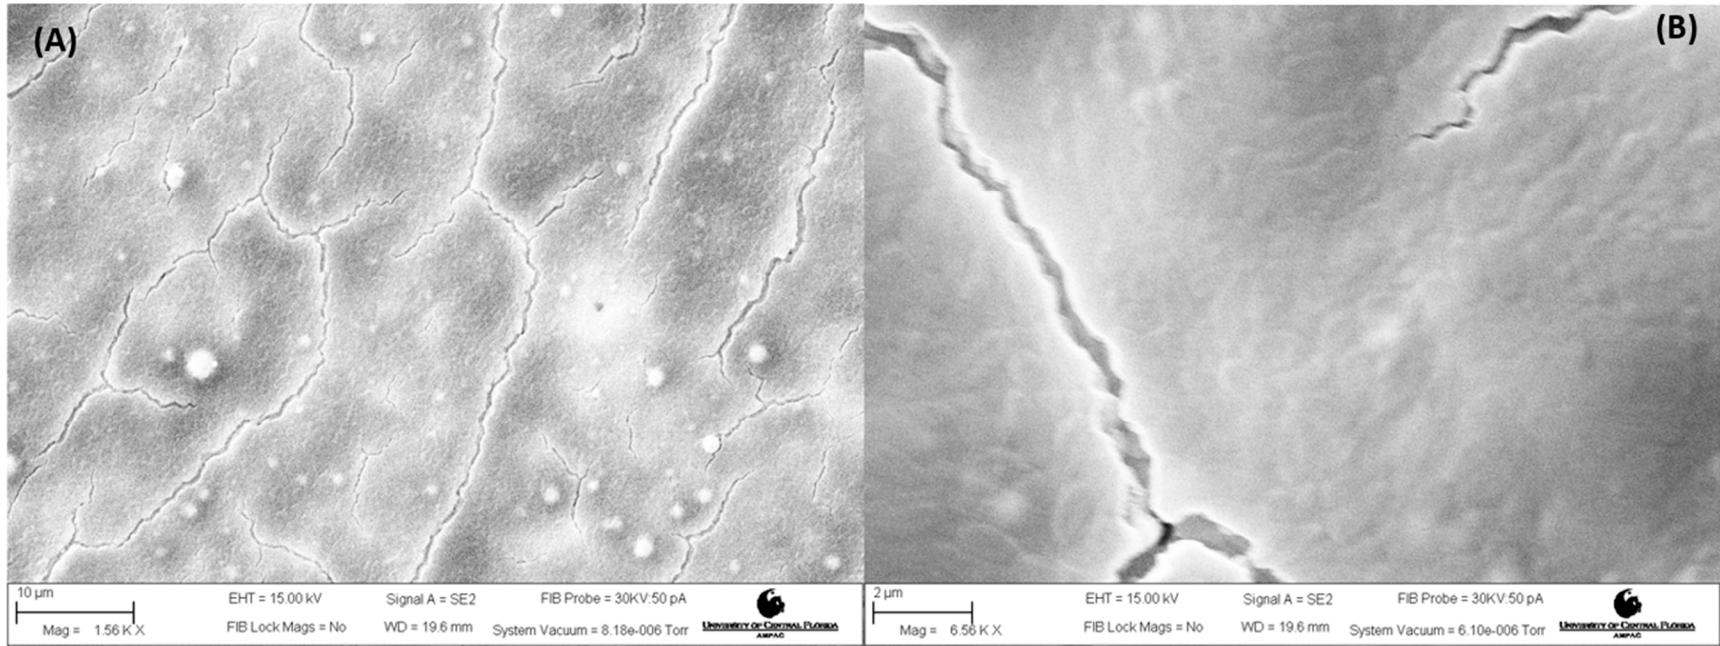

Figure S5. (A) SEM close up of *Pseudomonas Aeruginosa* dried biofilm growth. (B) Close up of dried biofilm growth.



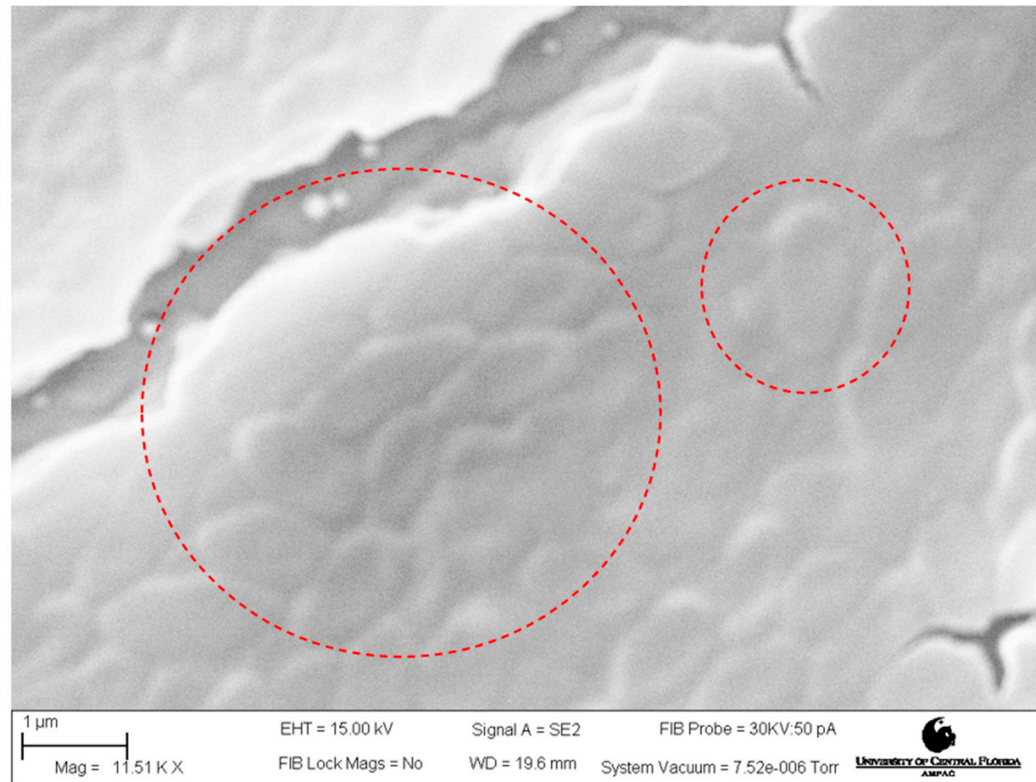

Figure S6. SEM close up biofilm growth showing individual cells forming biofilm for *Pseudomonas Aeruginosa*.

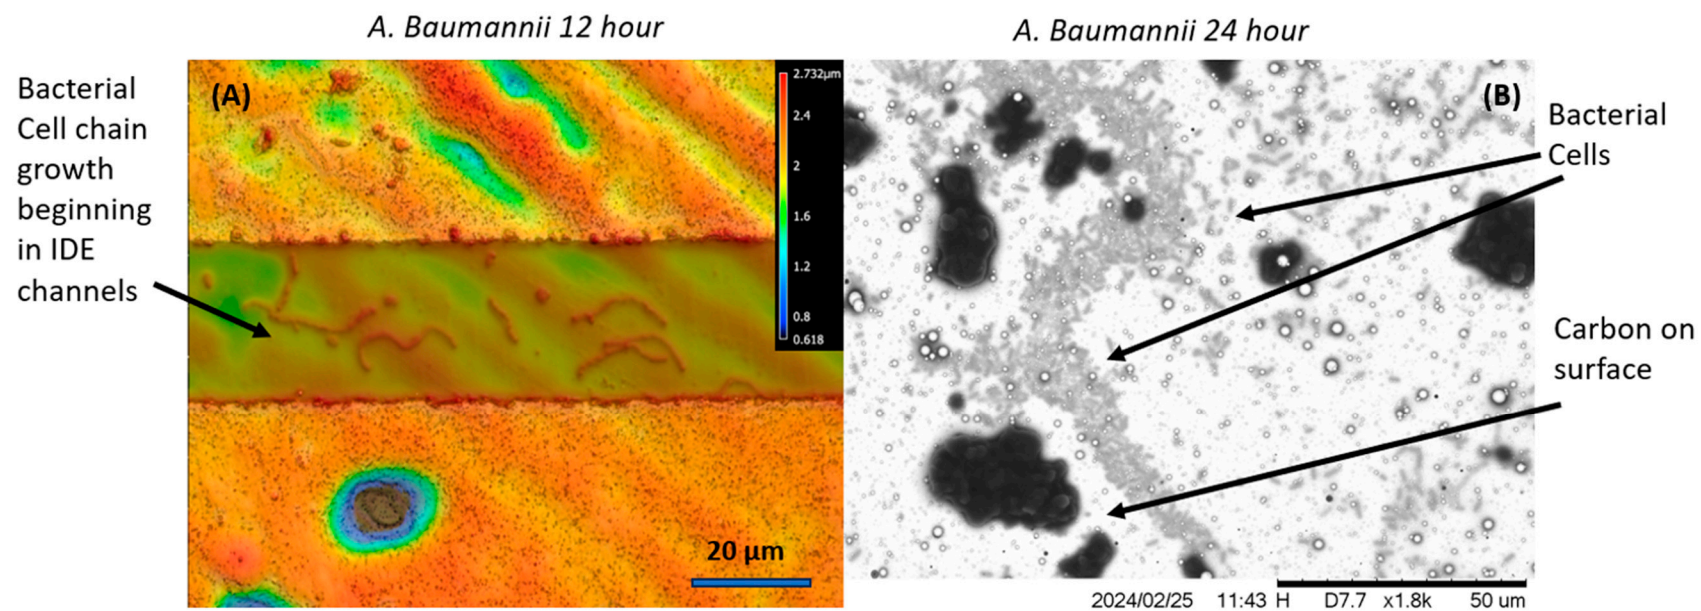

Figure S7. (A) Confocal Height Image of the interdigitated electrode gap with *A. Baumannii* cell chains forming. (B) SEM image showing *A. Baumannii* biofilm cells at the 24-hour point.



## Searching the Query

In order to view the database inputs and determine whether our theory bacterial databases development would have any use, the results were also queried against the MIC stencil antibiotics and the corresponding pharmaceuticals would be useful. The resulting search query from the above IDE sharded example leads to a dropdown menu for the user as shown in figure S7.

### Drop down menu

The figure displays two versions of a search interface for an interdigitated electrode partitioned database. Both interfaces are titled "Preview: Sheet1\_1 Chart".

**Left Interface:**

- IDE Frequency (Hz):
- Time (Hr):  (Dropdown menu open showing values: 0, 1, 2, 4, 6, 8, 12, 18, 24, 36, 48, 72)
- Real Impedance (Lower Bound):
- Real Impedance (Upper Bound):
- Imaginary Impedance (Lower Bound):
- Imaginary Impedance (upper Bound):
- Phase (Lower Bound):
- Phase (Upper Bound):
- Capacitance (Lower Bound):
- Capacitance (Upper Bound):
- Bacteria:
- SEARCH button

**Right Interface:**

- IDE Frequency (Hz):  (Dropdown menu open showing values: 482.31785, 9772.37221, 159710.44999, 198000.67311)
- Time (Hr):
- Real Impedance (Lower Bound):
- Real Impedance (Upper Bound):
- Imaginary Impedance (Lower Bound):
- Imaginary Impedance (upper Bound):
- Phase (Lower Bound):
- Phase (Upper Bound):
- Capacitance (Lower Bound):
- Capacitance (Upper Bound):
- Bacteria:
- SEARCH button

FigureS8. Interdigitated electrode partitioned database drop down and enterable standard deviation search menu.

IDE Frequency (Hz)

9772.37221

Time (Hr)

8

Real Impedance (Lower Bound)

Real Impedance (Upper Bound)

Imaginary Impedance (Lower Bound)

Imaginary Impedance (upper Bound)

Phase (Lower Bound)

Phase (Upper Bound)

Capacitance (Lower Bound)

Capacitance (Upper Bound)

Bacteria

SEARCH

| IDE Frequency (Hz) | Time (Hr) | Real Impedance ( $\Omega$ ) | STD      | Imaginary Impedance ( $\Omega$ ) | STD      | Phase ( $^{\circ}$ ) | STD1    | Capacitance (F) | STD2 | Bacteria                |                                                                                                                  |
|--------------------|-----------|-----------------------------|----------|----------------------------------|----------|----------------------|---------|-----------------|------|-------------------------|------------------------------------------------------------------------------------------------------------------|
| 9772.37221         | 8         | 180.53005                   | 33.10215 | -18.45695                        | 33.10215 | -5.8819              | 0.246   | 0.000001        | 0    | Bacillus Subtilis       |  <a href="#">View Details</a> |
| 9772.37221         | 8         | 161.49612                   | 16.12494 | -23.7872                         | 16.12494 | -8.42119             | 1.52781 | 0.000001        | 0    | Psuedomonas Aeruginosa  |  <a href="#">View Details</a> |
| 9772.37221         | 8         | 198.32984                   | 18.92869 | -32.15516                        | 18.92869 | -9.32108             | 1.22754 | 0.000001        | 0    | Acinetobacter Baumannli |  <a href="#">View Details</a> |

Records 1-3 of 3

Figure S9. Using the dropdown menu for the Interdigitated electrode sharded database drop down menu.

|              |    |           |           |            |           |          |         |          |   |                        |                              |
|--------------|----|-----------|-----------|------------|-----------|----------|---------|----------|---|------------------------|------------------------------|
| 159710.44999 | 0  | 237.92333 | 41.86321  | -10.19948  | 41.86321  | -2.51573 | 0.1927  | 0        | 0 | Bacillus Subtilis      | <a href="#">View Details</a> |
| 159710.44999 | 1  | 187.48576 | 37.81173  | -7.11385   | 37.81173  | -2.16002 | 0.10506 | 0        | 0 | Bacillus Subtilis      | <a href="#">View Details</a> |
| 159710.44999 | 36 | 160.39131 | 22.15945  | -5.94686   | 22.15945  | -2.12858 | 0.07431 | 0        | 0 | Bacillus Subtilis      | <a href="#">View Details</a> |
| 159710.44999 | 48 | 156.60463 | 22.02985  | -6.163     | 22.02985  | -2.26621 | 0.11201 | 0        | 0 | Bacillus Subtilis      | <a href="#">View Details</a> |
| 159710.44999 | 72 | 187.11446 | 50.4265   | -7.62546   | 50.4265   | -2.28468 | 0.13532 | 0        | 0 | Bacillus Subtilis      | <a href="#">View Details</a> |
| 198000.67311 | 0  | 237.24561 | 41.75944  | -9.32492   | 41.75944  | -2.30712 | 0.18486 | 0        | 0 | Bacillus Subtilis      | <a href="#">View Details</a> |
| 198000.67311 | 36 | 159.79047 | 22.1174   | -5.57127   | 22.1174   | -2.00145 | 0.08734 | 0        | 0 | Bacillus Subtilis      | <a href="#">View Details</a> |
| 198000.67311 | 48 | 155.94624 | 21.99444  | -5.80146   | 21.99444  | -2.14103 | 0.10589 | 0        | 0 | Bacillus Subtilis      | <a href="#">View Details</a> |
| 198000.67311 | 72 | 186.22578 | 50.15264  | -7.37911   | 50.15264  | -2.216   | 0.14795 | 0        | 0 | Bacillus Subtilis      | <a href="#">View Details</a> |
| 9772.37221   | 2  | 184.99193 | 20.22294  | -32.70757  | 20.22294  | -9.98105 | 1.69927 | 0.000001 | 0 | Psuedomonas Aeruginosa | <a href="#">View Details</a> |
| 9772.37221   | 4  | 174.03885 | 20.11954  | -29.05042  | 20.11954  | -9.45678 | 1.62863 | 0.000001 | 0 | Psuedomonas Aeruginosa | <a href="#">View Details</a> |
| 9772.37221   | 6  | 167.79159 | 20.35586  | -26.27327  | 20.35586  | -8.90082 | 1.60332 | 0.000001 | 0 | Psuedomonas Aeruginosa | <a href="#">View Details</a> |
| 9772.37221   | 8  | 161.49612 | 16.12494  | -23.7872   | 16.12494  | -8.42119 | 1.52781 | 0.000001 | 0 | Psuedomonas Aeruginosa | <a href="#">View Details</a> |
| 9772.37221   | 12 | 148.0709  | 27.40616  | -22.70951  | 27.40616  | -7.87598 | 1.41096 | 0.000001 | 0 | Psuedomonas Aeruginosa | <a href="#">View Details</a> |
| 9772.37221   | 18 | 336.44741 | 246.6231  | -33.66994  | 246.6231  | -6.09707 | 2.53068 | 0.000001 | 0 | Psuedomonas Aeruginosa | <a href="#">View Details</a> |
| 9772.37221   | 24 | 961.31271 | 1108.9165 | -150.24545 | 1108.9165 | -6.79283 | 1.45751 | 0.000001 | 0 | Psuedomonas Aeruginosa | <a href="#">View Details</a> |
| 159710.44999 | 0  | 209.3616  | 5.55301   | -8.36711   | 5.55301   | -2.31143 | 0.82344 | 0        | 0 | Psuedomonas Aeruginosa | <a href="#">View Details</a> |
| 159710.44999 | 1  | 189.11385 | 20.75583  | -7.08943   | 20.75583  | -2.18646 | 0.80592 | 0        | 0 | Psuedomonas Aeruginosa | <a href="#">View Details</a> |
| 159710.44999 | 2  | 169.09002 | 17.24457  | -6.4879    | 17.24457  | -2.17506 | 0.71958 | 0        | 0 | Psuedomonas Aeruginosa | <a href="#">View Details</a> |

Figure S10. Not using the dropdown menu and including all hours leads to a multitude of options for bacterial discovery.

In **Figure S9** it is observed how using the dropdown menu leads to a limited number of results, depicting the three studied bacteria at the 9.77 kHz frequency point, while also revealing the real impedance, imaginary impedance, capacitance and phase at the selected 8-hour mark. If a time or a frequency point was not selected, every entry point in the database would be shown with the option to scroll the system **Figure S10**. This same instance is shown when using the sharded susceptibility database in **Figure S11**. In this instance an antibiotic mass of 7.5 µg was selected, leading to a table that includes every antibiotic that uses a mass of 7.5 µg which in BacteSign are Oxytetracycline and Kanamycin. In this instance a public health provider could scroll the database and make a decision with his/her resultant susceptibility test themselves, or they could take the

next step and manually enter the lower and upper bound values with their calculated standard deviation shown in **Figure S12**. Entering a bound for the sample under test, improves the search criteria where for an example usage of 6 mm and 10 mm values for an upper and lower bound for the search, leading to a result only two of the three possible bacterial pathogens would be the result. If the search criteria were made tighter such as 8 mm and 10 mm it leads to one solution of bacteria, in this case being *B. Subtilis*.

Preview: Antibiotic Susceptibility

[DataPage Logout](#)
[@ Parameters](#)

Antibiotic Mass

7.5

Antibiotics

Bacteria

Mac Kirby (lower bound)

Mac Kirby (upper bound)

Mac Stencil (lower bound)

Mac Stencil (upper bound)

SEARCH

[Download Data](#)

| Bacteria    | Mac Kirby | Mac Stencil | Antibiotic Mass | Antibiotics     | Agar |                         |
|-------------|-----------|-------------|-----------------|-----------------|------|-------------------------|
| Baumannii   |           |             | 7.5             | Oxytetracycline | LB   | <a href="#">Details</a> |
| Bacillus S. | 9.56667   | 8.52333     | 7.5             | Oxytetracycline | MAC  | <a href="#">Details</a> |
| Psuedomonas | 4.29833   | 0.42667     | 7.5             | Oxytetracycline | MAC  | <a href="#">Details</a> |
| Baumannii   | 7.89      | 7.53333     | 7.5             | Oxytetracycline | MAC  | <a href="#">Details</a> |
| Baumannii   |           |             | 7.5             | Kanamycin       | LB   | <a href="#">Details</a> |
| Bacillus S. | 3.8       | 4.15667     | 7.5             | Kanamycin       | MAC  | <a href="#">Details</a> |

Figure S11: Entering an Antibiotic Mass and limiting the search with a lower and upper bound Susceptibility test values.

Preview: Antibiotic Susceptibility

DataPage Logout

@ Parameters

Antibiotic Mass

7.5

Antibiotics

Bacteria

Mac Kirby (lower bound)

8

Mac Kirby (upper bound)

10

Mac Stencil (lower bound)

Mac Stencil (upper bound)

SEARCH

Download Data

| Bacteria    | Mac Kirby | Mac Stencil | Antibiotic Mass | Antibiotics     | Agar |
|-------------|-----------|-------------|-----------------|-----------------|------|
| Bacillus S. | 9.56667   | 8.52333     | 7.5             | Oxytetracycline | MAC  |

Details

Records 1-1 of 1

Figure S12: Using lower and upper bounds as a manual entrance for standard deviation.
